# Supplementary material for: Systematic tissue collection during clinical breast biopsy is feasible, safe and enables high-content translational analyses
Source: PubMed Central journal article supplement (PMC8455592; doi:10.1038/s41698-021-00224-w), 2021-09-21
Supplement: 41698_2021_224_MOESM1_ESM.pdf [file 41698_2021_224_MOESM1_ESM.pdf]

## SUPPLEMENTARY FIGURES

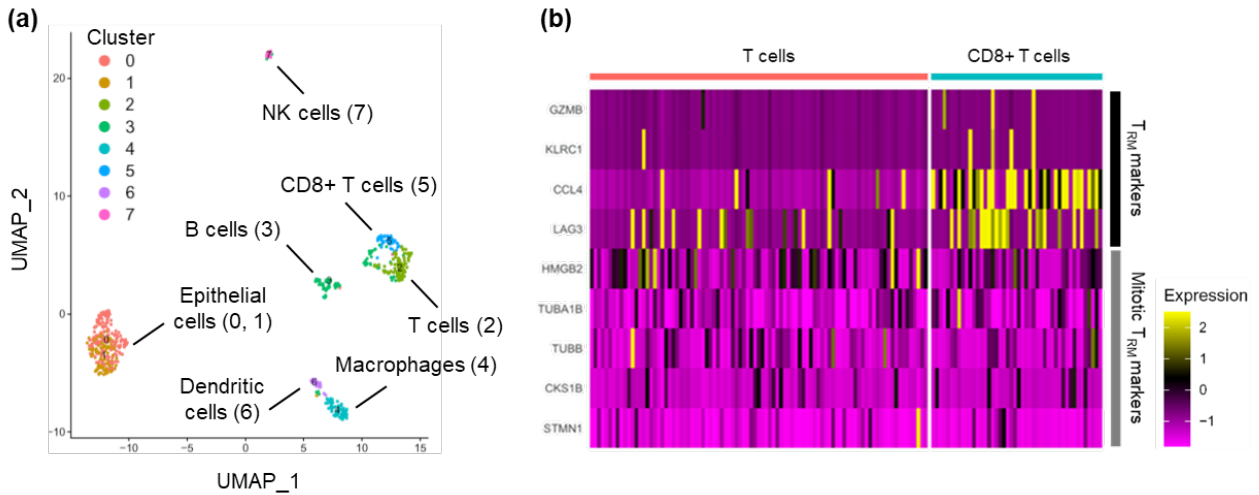

### Supplementary Figure 1. Single-cell transcriptomic analysis shows cellular diversity in a research core biopsy specimen.

(a) High-dimensional uniform manifold approximation and projection (UMAP) clustering of single-cell transcriptomic data from a triple-negative breast core biopsy specimen shows a diverse composition of epithelial, lymphoid and myeloid cells.

(b) Heatmap of single-cell transcriptome of all T cells identified in the triple-negative breast core biopsy specimen. T cells positive for non-mitotic T<sub>RM</sub> markers (top) were enriched in the CD8+ T cell cluster, while few or none of them were positive for mitotic T<sub>RM</sub> markers (bottom). T<sub>RM</sub> markers were derived from a previous publication (Savas P et al., 2018).

See also Figure 3C.

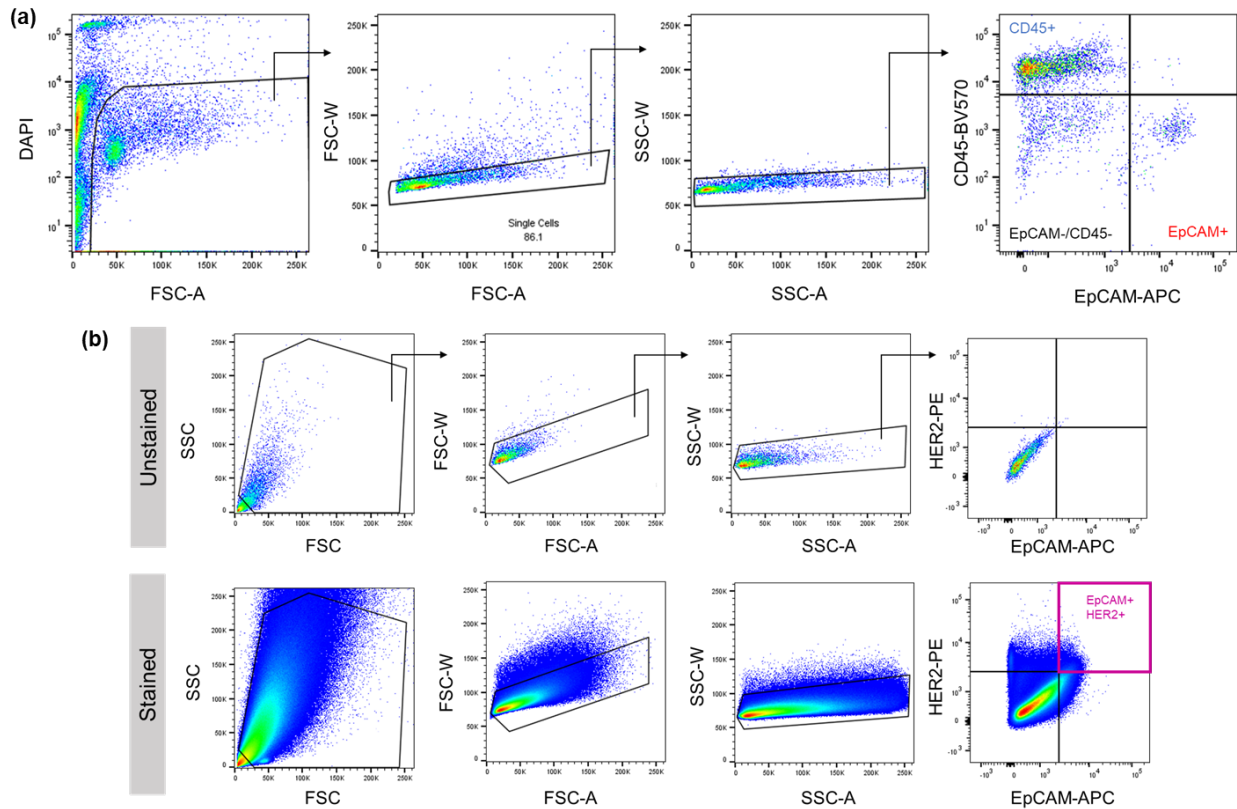

**Supplementary Figure 2. Gating strategies were used to define specific cell populations in research core biopsy specimens.**

(a) Gating strategy used to identify viable (DAPI-negative) EpCAM-positive, CD45-positive or double-negative cells. See also Figure 2c.

(b) Gating strategy used to identify formalin-fixed EpCAM/HER2-positive cells. See also Figure 3b.

**SUPPLEMENTARY TABLE**

| Specimen<br>-Clinical specimen<br>-Research specimen | Primary pathologic<br>diagnosis | Grade      | Cellularity  |
|------------------------------------------------------|---------------------------------|------------|--------------|
| 1                                                    | IDC<br>IDC                      | 1<br>1     | < 5%<br>< 5% |
| 2                                                    | IDC<br>IDC                      | 1<br>1     | 10%<br>< 1%  |
| 3                                                    | Fibroadenoma<br>Fibroadenoma    | N/A<br>N/A | N/A<br>N/A   |
| 4                                                    | IDC<br>IDC                      | 2-3<br>2   | 20%<br>20%   |
| 5                                                    | ILC<br>ILC                      | 2-3<br>2   | 30%<br>30%   |
| 6                                                    | IDC<br>IDC                      | 3<br>3     | 20%<br>30%   |
| 7                                                    | IDC<br>IDC                      | 3<br>3     | 60%<br>10%   |
| 8                                                    | ILC<br>ILC                      | 2<br>2     | 30%<br>30%   |
| 9                                                    | IDC<br>Non-diagnostic, debris   | 2<br>N/A   | 50%<br>N/A   |
| 10                                                   | IDC<br>IDC                      | 2<br>2     | 40%<br>40%   |

**Legend:** IDC, invasive ductal carcinoma; ILC, invasive lobular carcinoma.

**Supplementary Table 1.** Concordance between clinical and research biopsy specimens.
